# Supplementary material
Source: Research Square preprint supplement (doi:10.21203/rs.3.rs-9870714/v1)
Supplement: Supplementary file 1 [file 0415ab76ecb7f80c4b45e28f.docx]

>EMBOSS_001

ATGGCGCGCGGCAAAAAAATTGGCTATAGCGGCCTGAAAAGCCGCCAGACCAAAGATAAA

GCGGCGGAAGCGGCGGCGCCGGCGGCGCCGGCGCCGGCGCCGGAAGTGACCCCGGCGGCG

GCGCCGGTGGTGGCGCCGGCGCCGGCGCCGGCGGAAGCGAAAAAAAGCGAAGAAAGCGAT

GATATGGGCTTTGGCCTGTTTGATGTGGCGAAAAACGTGGCGGCGGAAAGCGCGGCGGAA

GCGGCGGCGCCGGCGGAAGAAGCGGCGGCGGCGCCGGCGCCGGCGCCGGTGGTGAAAGAA

GCGAAAAAAGATCTGCATAGCCTGCTGGAACTGGGCACCAAACCGACCGCGCCGCATGTG

CGCAACAAAAAAGTGATTCTGTTTGATACCAACCATCAGGTGAGCATTTGCAACCAGATT

ATTGATGCGATTAACAGCGGCATTGATCTGGGCGATCTGCTGGAAGGCGGCCTGCTGACC

CTGTGCGTGGAACATTATTATAACAGCGATAAAGATAGCATTATTAGCAACAGCGTGGGC

CAGACCCGCTTTAGCGGCCTGCTGATTGTGAAAACCGTGCTGGAATTTATTCTGCAGAAA

ACCGATAGCGGCGTGACCCTGCATCCGCTGGTGCGCACCAGCAAAGTGAAAAACGAAGTG

GCGAGCTTTAAACAGGCGCTGAGCAACCTGGCGCGCCATGGCGAATATGCGCCGTTTGCG

AACCTGAGCGGCATTAACAACCTGGAACATGGCCTGTATCCGCAGCTGAGCGCGATTGCG

CTGGGCGTGGCGACCGCGCATGGCAGCACCCTGGCGGGCGTGAACGTGGGCGAACAGTAT

CAGCAGCTGCGCGAAGCGGCGCATGATGCGGAAGTGAAACTGCAGCGCCGCCATGAACAT

CAGGAAATTCAGGCGATTGCGACCGTGCAGGCGCGCCCGATGAACCGCCCGACCGCGCTG

CCGCCGCCGGTGGATGATAAAATTGAACATGAAAGCACCGAAGATAGCAGCAGCAGCAGC

AGCTTTGTGGATCTGAACGATCCGTTTGCGCTGCTGAACGAAGATGAAGATACCCTGGAT

GATAGCGTGATGATTCCGGGCACCACCAGCCGCGAATTTCAGGGCCCGCAGCGCGTGGTG

ACCAAAAAAGGCCGCACCTTTCTGTATCCGAACGATCTGCTGCAGACCAACCCGCCGGAA

AGCCTGATTACCGCGCTGGTGGAAGAATATCAGAACCCGGTGAGCGCGAAAGAACTGCAG

GCGGATTGGCCGGATATGAGCTTTGATGAACGCCGCCATGTGGCGATGTGCCCGGGCCCG

GGCGGCCTGTATCCGCAGCTGAGCGCGATTCTGATTCATCAGGGCGTGAACCTGGTGCTG

ACCCTGTGCGTGGAACATTATTATCAGCTGAGCGCGATTGCGCTGGGCGTGCAGACCCTG

GCGGTGCTGAGCCAGAAACGCCCGATGAACCGCCCGACCGCGCTGACCGAAATTACCCAT

AGCCAGACCCTGACCGTGCAGGCGCGCCCGATGAACCGCTATCCGCAGCTGAGCGCGATT

GCGCTGGCGGCGTATGTGATTTTTGGCATTCTGCGCAGCAGCTTTATTCTGAAATTTGTG

CCGCTGATTCTGGCGCTGAAAACCCTGGAAAGCACCGAAAGCCAGAAAATTCTGGAACAG

TTTCATCTGCAGAAAACCGAAATTACCCATACCGTGCTGGAATTTATTCTGCAGAAAACC

GATAGCGGCGTGACCCGCGGCCGCATTGGCCTGTTTCTGAGCTTTTGCAGCCTGTTTCTG

ATTGCGCTGGGCGTGGCGACCGCGCATGGCAGCACCCTGGCGGGCGCGACCCGCTTTCTG

GATGTGATTCCGAACGAACCGCATTATAGCGAACATGGCCTGTATCCGCAGCTGAGCGCG

ATTGCGCTGGGCGTGCCGCAGCTGAGCGCGATTGCGCTGGGCGTGGCGACCGCGCATGGC

AGCCAGACCCTGGCGGTGCTGAGCCAGAAACGCGAAAAACTGGCGCATCATCATCATCAT

CAT
