# Supplementary material
Source: Research Square preprint supplement (doi:10.21203/rs.3.rs-9870714/v1)
Supplement: Supplementary file 2 [file 139f9dd60b3f995b929252ea.docx]

| **Peptide** | **Allele** | **Antigenecity** | **Allergenecity** |
| --- | --- | --- | --- |
| VIFGILRSSFILKFV | HLA-DPA1*01:03/DPB1*02:01 , HLA-DPA1*01:03/DPB1*04:01 , HLA-DPA1*02:01/DPB1*01:01 , HLA-DPA1*02:01/DPB1*05:01 , HLA-DPA1*03:01/DPB1*04:02 , HLA-DRB1*01:01 , HLA-DRB1*07:01 , HLA-DRB1*09:01 , HLA-DRB1*12:01 , HLA-DRB1*13:02 , HLA-DRB1*15:01 , HLA-DRB5*01:01 | Antigen | Non-allergen |
| PLILALKTLESTESQ | HLA-DRB1*01:01 , HLA-DRB1*04:01 , HLA-DRB1*04:05 , HLA-DRB4*01:01 | Antigen | Non-allergen |
| KILEQFHLQKTEITH | HLA-DRB1*01:01 , HLA-DRB1*04:05 , HLA-DRB4*01:01 | Antigen | Non-allergen |
| TVLEFILQKTDSGVT | HLA-DRB1*01:01 , HLA-DRB1*04:01 , HLA-DRB4*01:01 | Antigen | Non-allergen |
| RGRIGLFLSFCSLFL | HLA-DPA1*01:03/DPB1*02:01 , HLA-DRB1*07:01 , HLA-DRB1*15:01 | Antigen | Non-allergen |
| IALGVATAHGSTLAG | HLA-DQA1*05:01/DQB1*03:01 , HLA-DRB1*01:01 , HLA-DRB1*09:01 | Antigen | Non-allergen |
| ATRFLDVIPNEPHYS | HLA-DRB1*04:01 , HLA-DRB1*04:05 , HLA-DRB1*13:02 | Antigen | Non-allergen |
| EHGLYPQLSAIALGV | HLA-DRB1*01:01 , HLA-DRB1*09:01 | Antigen | Non-allergen |
| PQLSAIALGVATAHG | HLA-DQA1*05:01/DQB1*03:01 , HLA-DRB1*01:01 | Antigen | Non-allergen |
| SQTLAVLSQKREKLA | HLA-DRB1*11:01 , HLA-DRB5*01:01 | Antigen | Non-allergen |
