# Supplementary material
Source: Research Square preprint supplement (doi:10.21203/rs.3.rs-9870714/v1)
Supplement: Supplementary file 3 [file 1cc8f9fa259ccba658c8e98e.pdf]

# C-IMMSIM simulation results

May 23, 2026

## Abstract

This document includes the plots relative to the simulation and the outcome of the epitope/peptide prediction used.

Produced by the C-IMMSIM Online server available at  
<http://c-immsim.iac.rm.cnr.it> (alias to <http://kraken.iac.rm.cnr.it/C-IMMSIM>)

CITATIONS: For publication of results, please cite the following:

Nicolas Rapin, Ole Lund, Massimo Bernaschi, Filippo Castiglione. Computational Immunology Meets Bioinformatics: The Use of Prediction Tools for Molecular Binding in the Simulation of the Immune System. PLoS ONE 5(4): e9862  
doi:10.1371/journal.pone.0009862, 2010

A retrospective validation

In-silico evaluation of adenoviral COVID-19 vaccination protocols: Assessment of immunological memory up to 6 months after the third dose. P. Stolfi, F. Castiglione, E. Mastrostefano, I. Di Biase, S. Di Biase, G. Palmieri, A. Prisco. Frontiers in Immunology, 13 (2022) doi: 10.3389/fimmu.2022.998262  
<https://www.frontiersin.org/articles/10.3389/fimmu.2022.998262>

An in vivo validation

Identification and validation of viral antigens sharing sequence and structural homology with tumor associated antigens (TAAs). C. Ragone, C. Manolio, B. Cavalluzzo, A. Petrizzo, A. Mauriello, M-L. Tornesello, F. M. Buonaguro, F. Castiglione, L. Vitagliano, M. Ruvo, M. Tagliamonte, L. Buonaguro. Journal for ImmunoTherapy of Cancer. 9:e002694 (2021)  
<https://jitc.bmj.com/content/9/5/e002694>

Original C-IMMSIM model: [www.iac.cnr.it/~filippo/c-immsim](http://www.iac.cnr.it/~filippo/c-immsim)

GETTING HELP:

Scientific problems: Filippo Castiglione (filippo dot castiglione at cnr dot it)

Technical problems: Ilaria Gonnella (ilaria dot gonnella at cnr dot it)

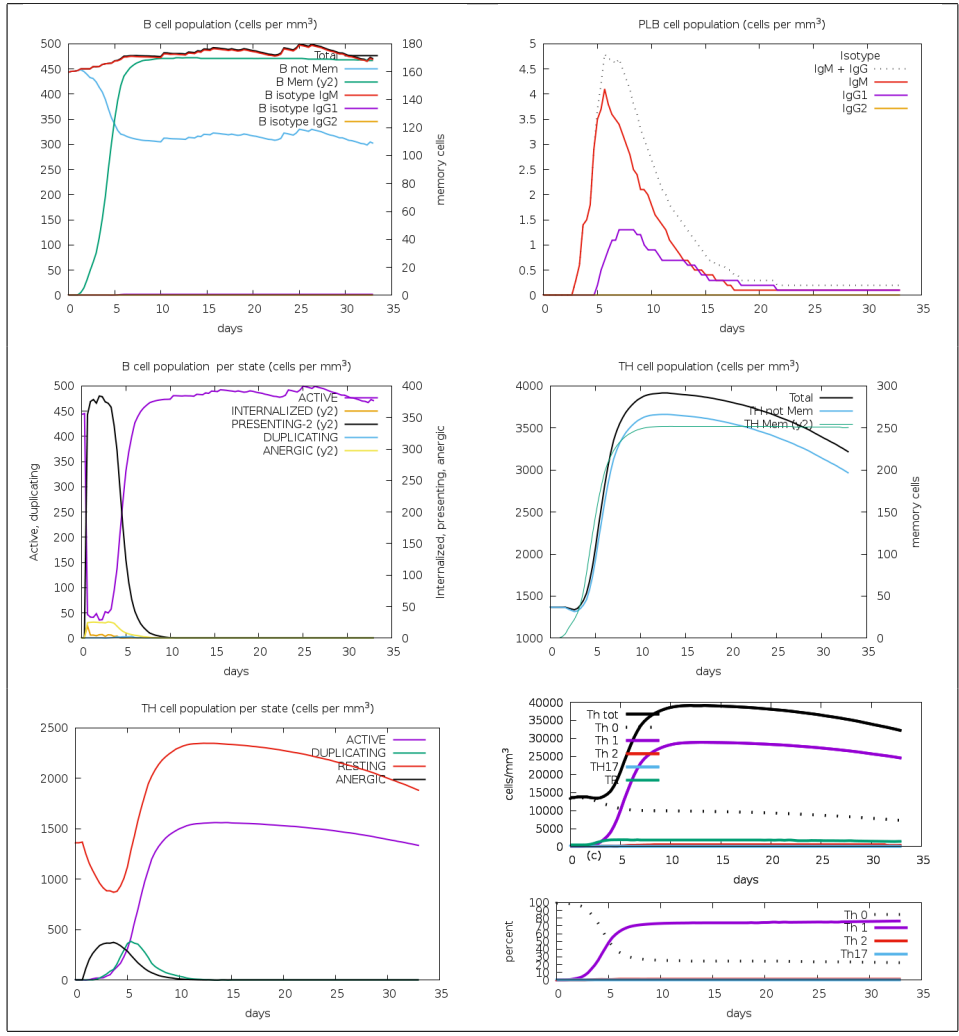

Figure 1: Cell counts shown. Legend: Act=active, Intern=internalized the Ag, Pres II = presenting on MHC II, Dup = in the mitotic cycle, Anergic = anergic, Resting = not active.

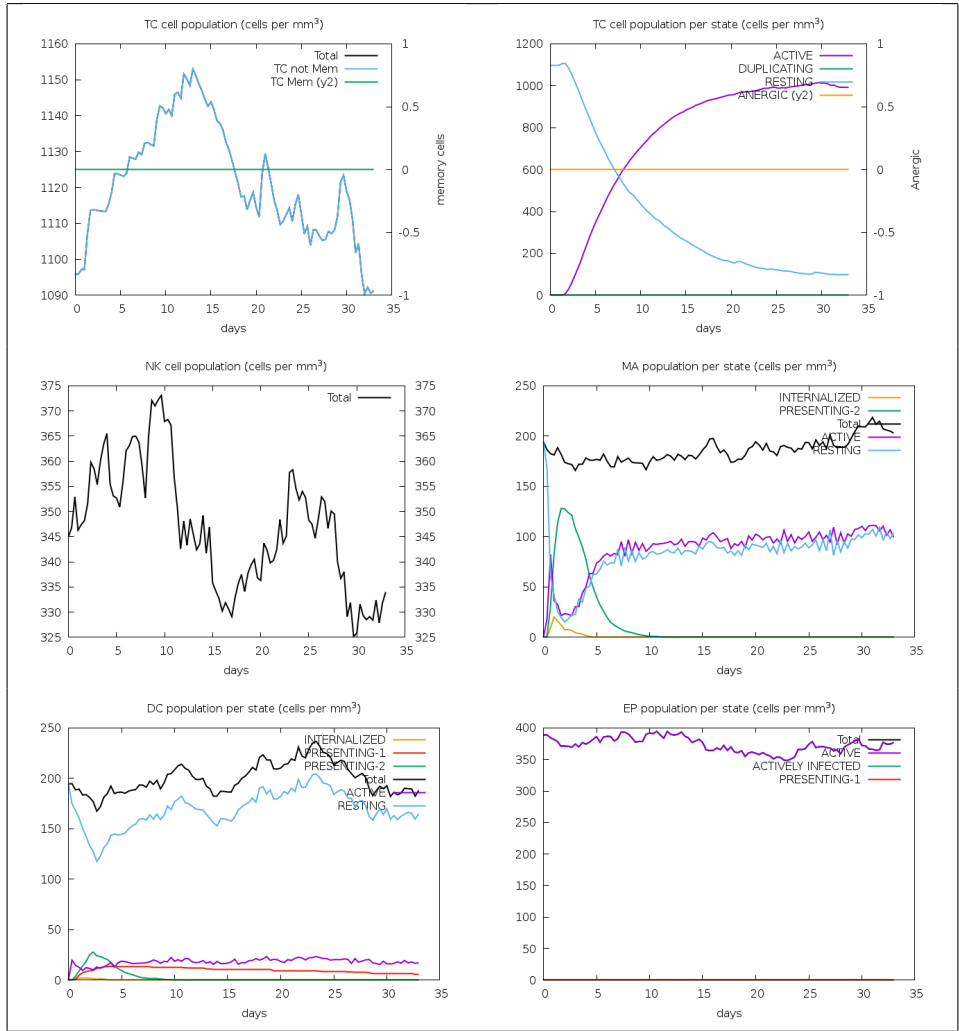

Figure 2: Legend: symbols as figure above.

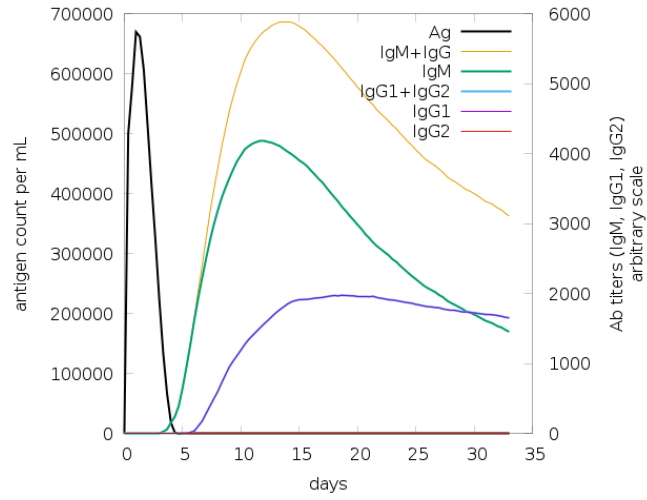

Figure 3: The virus, the immunoglobulins and the immunocomplexes.

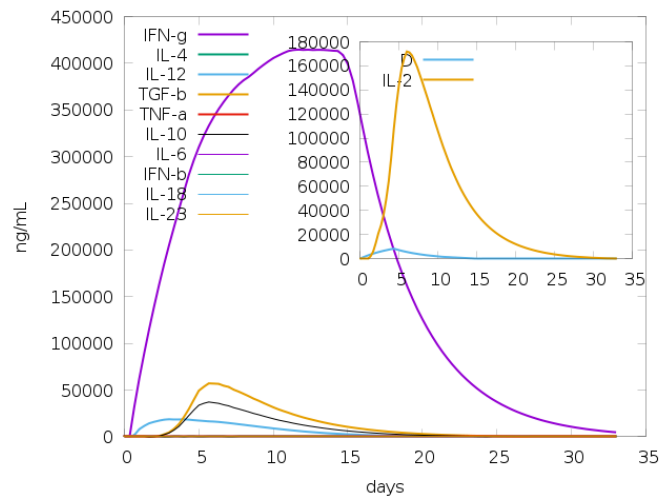

Figure 4: Concentration of cytokines and interleukins. Inset plot shows danger signal together with leukocyte growth factor IL-2.



AAAPAEAAAAAPAPVVKAEAKDLHSLLELGTKPTAPHVRNKKVILFDTNHQVSIICNQIIDAINGIDLGDLEGGLLT  
LCVEHYNSDKDSIISNSVGQTRFSGLLIVKTVLEFILQKTDSGVTLHPLVRTSKVKNEVASFKQALSNLARHGEYAPFA  
NLSGINNLEHGLYPQLSAIALGVATAHGSTLAGVNVGEYQQLREAAHDAEVKLRREHHEQEIQAIAIVQARPMNRPTAL  
PPPVDKIEHESTEDSSSSSFVDLNDPFDLNEDETLDDSVMIPTTSREFQGPQRVVTKKGRFTLYPNDLLQTNPPE  
SLITALVEEYQNPVSAKELQADWPDMSFDERRHVAMCPGPGGLYPQLSAILIHQGVNLVLTLCVEHYQLSAIALGVQTL  
AVLSQKRPMNRPTALTEITHSQTTLVQARPMNRYPLSAIALAAYVIFGILRSSFILKFVPLILALKTLESTESQKILEQ  
FHLQKTEITHTVLEFILQKTDSGVTGRIGLFLSFCSLFLIALGVATAHGSTLAGATRFDVIIPNEPHYSEHGLYPQLSA  
IALGVPQLSAIALGVATAHGSTLAVLSQKRELAHHHHHH

Epitopes of protein 0 -----

|    |          |                |                             |                   |
|----|----------|----------------|-----------------------------|-------------------|
| 0] | pos= 158 | score=0.001019 | unnormalised=0.1106000000   | LTLCEHYHY         |
| 1] | pos= 199 | score=0.008216 | unnormalised=0.8916000000   | KTDSGVTLH         |
| 2] | pos= 459 | score=0.001019 | unnormalised=0.1106000000   | LTLCEHYHY         |
| 3] | pos= 516 | score=0.023615 | unnormalised=2.5626000000   | LSAIALAAY         |
| 4] | pos= -1  | score=0.966130 | unnormalised=104.8410000000 | non-binding event |

=====  
Allele: A0101  
Pseudo sequence: KAVHAEQRNKAQTRA  
Threshold: 9.456400  
Max score: 29.236000

-----  
Antigen sequence file: /opt/lampp/htdocs/C-IMMSIM/Jobs/input/50712\_20260523-104210\_5\_km00QLjwdbkx.FSA\_1\_001  
-----

MARGKKIGYSGLSRQTKDKAAEAAAAAPAPAPEVTPAAAPVVAPAPAPAEAKKSEESDDMGFLFDVAKNVAESAAE  
AAAPAEAAAAAPAPVVKAEAKDLHSLLELGTKPTAPHVRNKKVILFDTNHQVSIICNQIIDAINGIDLGDLEGGLLT  
LCVEHYNSDKDSIISNSVGQTRFSGLLIVKTVLEFILQKTDSGVTLHPLVRTSKVKNEVASFKQALSNLARHGEYAPFA  
NLSGINNLEHGLYPQLSAIALGVATAHGSTLAGVNVGEYQQLREAAHDAEVKLRREHHEQEIQAIAIVQARPMNRPTAL  
PPPVDKIEHESTEDSSSSSFVDLNDPFDLNEDETLDDSVMIPTTSREFQGPQRVVTKKGRFTLYPNDLLQTNPPE  
SLITALVEEYQNPVSAKELQADWPDMSFDERRHVAMCPGPGGLYPQLSAILIHQGVNLVLTLCVEHYQLSAIALGVQTL  
AVLSQKRPMNRPTALTEITHSQTTLVQARPMNRYPLSAIALAAYVIFGILRSSFILKFVPLILALKTLESTESQKILEQ  
FHLQKTEITHTVLEFILQKTDSGVTGRIGLFLSFCSLFLIALGVATAHGSTLAGATRFDVIIPNEPHYSEHGLYPQLSA  
IALGVPQLSAIALGVATAHGSTLAVLSQKRELAHHHHHH

Epitopes of protein 0 -----

|    |          |                |                             |                   |
|----|----------|----------------|-----------------------------|-------------------|
| 0] | pos= 158 | score=0.001019 | unnormalised=0.1106000000   | LTLCEHYHY         |
| 1] | pos= 199 | score=0.008216 | unnormalised=0.8916000000   | KTDSGVTLH         |
| 2] | pos= 459 | score=0.001019 | unnormalised=0.1106000000   | LTLCEHYHY         |
| 3] | pos= 516 | score=0.023615 | unnormalised=2.5626000000   | LSAIALAAY         |
| 4] | pos= -1  | score=0.966130 | unnormalised=104.8410000000 | non-binding event |

=====  
Allele: B0702  
Pseudo sequence: KAAREEQIKAQTRE  
Threshold: 8.702800  
Max score: 28.406000

-----  
Antigen sequence file: /opt/lampp/htdocs/C-IMMSIM/Jobs/input/50712\_20260523-104210\_5\_km00QLjwdbkx.FSA\_1\_001  
-----

MARGKKIGYSGLSRQTKDKAAEAAAAAPAPAPEVTPAAAPVVAPAPAPAEAKKSEESDDMGFLFDVAKNVAESAAE  
AAAPAEAAAAAPAPVVKAEAKDLHSLLELGTKPTAPHVRNKKVILFDTNHQVSIICNQIIDAINGIDLGDLEGGLLT  
LCVEHYNSDKDSIISNSVGQTRFSGLLIVKTVLEFILQKTDSGVTLHPLVRTSKVKNEVASFKQALSNLARHGEYAPFA  
NLSGINNLEHGLYPQLSAIALGVATAHGSTLAGVNVGEYQQLREAAHDAEVKLRREHHEQEIQAIAIVQARPMNRPTAL  
PPPVDKIEHESTEDSSSSSFVDLNDPFDLNEDETLDDSVMIPTTSREFQGPQRVVTKKGRFTLYPNDLLQTNPPE  
SLITALVEEYQNPVSAKELQADWPDMSFDERRHVAMCPGPGGLYPQLSAILIHQGVNLVLTLCVEHYQLSAIALGVQTL  
AVLSQKRPMNRPTALTEITHSQTTLVQARPMNRYPLSAIALAAYVIFGILRSSFILKFVPLILALKTLESTESQKILEQ  
FHLQKTEITHTVLEFILQKTDSGVTGRIGLFLSFCSLFLIALGVATAHGSTLAGATRFDVIIPNEPHYSEHGLYPQLSA

IALGVPQLSAIALGVATAHGSQLTAVLSQKREKLAHHHHHH

Epitopes of protein 0 -----

|     |      |     |                |                             |                   |
|-----|------|-----|----------------|-----------------------------|-------------------|
| 0]  | pos= | 25  | score=0.014627 | unnormalised=3.0192000000   | APAAPAPAP         |
| 1]  | pos= | 28  | score=0.010882 | unnormalised=2.2462000000   | APAPAPEVT         |
| 2]  | pos= | 30  | score=0.020314 | unnormalised=4.1932000000   | APAPEVTPA         |
| 3]  | pos= | 32  | score=0.011425 | unnormalised=2.3582000000   | APEVTPAAA         |
| 4]  | pos= | 36  | score=0.014850 | unnormalised=3.0652000000   | TPAAAPVVA         |
| 5]  | pos= | 40  | score=0.022601 | unnormalised=4.6652000000   | APVVAPAPA         |
| 6]  | pos= | 44  | score=0.027848 | unnormalised=5.7482000000   | APAPAPAEA         |
| 7]  | pos= | 82  | score=0.020048 | unnormalised=4.1382000000   | APAEAAAAA         |
| 8]  | pos= | 88  | score=0.006594 | unnormalised=1.3612000000   | AAAPAPAPV         |
| 9]  | pos= | 92  | score=0.006822 | unnormalised=1.4082000000   | APAPVVKEA         |
| 10] | pos= | 116 | score=0.000960 | unnormalised=0.1982000000   | APHVRNKKV         |
| 11] | pos= | 207 | score=0.008775 | unnormalised=1.8112000000   | HPLVRTSKV         |
| 12] | pos= | 236 | score=0.012960 | unnormalised=2.6752000000   | APFANLSGI         |
| 13] | pos= | 252 | score=0.031815 | unnormalised=6.5672000000   | YPQLSAIAL         |
| 14] | pos= | 311 | score=0.055297 | unnormalised=11.4142000000  | RPMNRPTAL         |
| 15] | pos= | 315 | score=0.035095 | unnormalised=7.2442000000   | RPTALPPP          |
| 16] | pos= | 364 | score=0.007592 | unnormalised=1.5672000000   | IPGTTTREF         |
| 17] | pos= | 486 | score=0.055297 | unnormalised=11.4142000000  | RPMNRPTAL         |
| 18] | pos= | 490 | score=0.000645 | unnormalised=0.1332000000   | RPTALTEIT         |
| 19] | pos= | 508 | score=0.030241 | unnormalised=6.2422000000   | RPMNRYQQL         |
| 20] | pos= | 513 | score=0.031815 | unnormalised=6.5672000000   | YPQLSAIAL         |
| 21] | pos= | 625 | score=0.007297 | unnormalised=1.5062000000   | EPHYSEHGL         |
| 22] | pos= | 634 | score=0.031815 | unnormalised=6.5672000000   | YPQLSAIAL         |
| 23] | pos= | 644 | score=0.026472 | unnormalised=5.4642000000   | VPQLSAIAL         |
| 24] | pos= | -1  | score=0.507912 | unnormalised=104.8410000000 | non-binding event |

=====  
 Allele: B0702  
 Pseudo sequence: KAAREEQIKAQTRE  
 Threshold: 8.702800  
 Max score: 28.406000

-----  
 Antigen sequence file: /opt/lampp/htdocs/C-IMMSIM/Jobs/input/50712\_20260523-104210\_5\_km00QLjwdbkx.FSA\_1\_001  
 -----

MARGKKIGYSGLSKRSQTKDKAAEAAAPAPAPAPEVTPAAAPVVAPAPAPAEAKKSEESDDMGFLFDVAKNVAESAEE  
 AAAPAEAAAAAPAPAPVVKAEAKKDLHSLLELGTKPTAPHVRNKKVILFDTNHQVSIQNIIIDAINSGIDLGLLEGLLT  
 LCVEHYNSDKDSIISNSVGGTRFSGLLIVKTVLEFILQKTDGVTLHPLVRTSKVKNEVASFKQALSNLARHGGEYAPFA  
 NLSGINNLEHGLYPQLSAIALGVATAHGSQLTAVLSQKREKLAHHHHHH  
 PPPVDDKIEHESTEDSSSSSFDLNDPFDLNEDEDTLDDSVMIPTGTTTREFQGPQRVVTKGRTFLYPNDLLQTNPPE  
 SLITALVEEYQNPVSAKELQADWPDMDFERRHVAMCPGGLYPQLSAILIHQGVNLVLTLCVEHYQLSAIALGVQTL  
 AVLSQKRPMMNRPTALTEITHSQTTLTVQARPMNRYQQLSAIALAAAYVIFGILRSSFILKFVPLILALKTLESTESQKILEQ  
 FHLQKTEITHVLEFILQKTDGVTTRIGRIGLFLSFCSLFLIALGVATAHGSQLTAVLSQKREKLAHHHHHH  
 IALGVPQLSAIALGVATAHGSQLTAVLSQKREKLAHHHHHH

Epitopes of protein 0 -----

|     |      |     |                |                           |           |
|-----|------|-----|----------------|---------------------------|-----------|
| 0]  | pos= | 25  | score=0.014627 | unnormalised=3.0192000000 | APAAPAPAP |
| 1]  | pos= | 28  | score=0.010882 | unnormalised=2.2462000000 | APAPAPEVT |
| 2]  | pos= | 30  | score=0.020314 | unnormalised=4.1932000000 | APAPEVTPA |
| 3]  | pos= | 32  | score=0.011425 | unnormalised=2.3582000000 | APEVTPAAA |
| 4]  | pos= | 36  | score=0.014850 | unnormalised=3.0652000000 | TPAAAPVVA |
| 5]  | pos= | 40  | score=0.022601 | unnormalised=4.6652000000 | APVVAPAPA |
| 6]  | pos= | 44  | score=0.027848 | unnormalised=5.7482000000 | APAPAPAEA |
| 7]  | pos= | 82  | score=0.020048 | unnormalised=4.1382000000 | APAEAAAAA |
| 8]  | pos= | 88  | score=0.006594 | unnormalised=1.3612000000 | AAAPAPAPV |
| 9]  | pos= | 92  | score=0.006822 | unnormalised=1.4082000000 | APAPVVKEA |
| 10] | pos= | 116 | score=0.000960 | unnormalised=0.1982000000 | APHVRNKKV |
| 11] | pos= | 207 | score=0.008775 | unnormalised=1.8112000000 | HPLVRTSKV |
| 12] | pos= | 236 | score=0.012960 | unnormalised=2.6752000000 | APFANLSGI |

|     |          |                |                             |                   |
|-----|----------|----------------|-----------------------------|-------------------|
| 13] | pos= 252 | score=0.031815 | unnormalised=6.5672000000   | YPQLSAIAL         |
| 14] | pos= 311 | score=0.055297 | unnormalised=11.4142000000  | RPMNRPTAL         |
| 15] | pos= 315 | score=0.035095 | unnormalised=7.2442000000   | RPTALPPP          |
| 16] | pos= 364 | score=0.007592 | unnormalised=1.5672000000   | IPGTTSREF         |
| 17] | pos= 486 | score=0.055297 | unnormalised=11.4142000000  | RPMNRPTAL         |
| 18] | pos= 490 | score=0.000645 | unnormalised=0.1332000000   | RPTALTEIT         |
| 19] | pos= 508 | score=0.030241 | unnormalised=6.2422000000   | RPMNRYPQL         |
| 20] | pos= 513 | score=0.031815 | unnormalised=6.5672000000   | YPQLSAIAL         |
| 21] | pos= 625 | score=0.007297 | unnormalised=1.5062000000   | EPHYSEHGL         |
| 22] | pos= 634 | score=0.031815 | unnormalised=6.5672000000   | YPQLSAIAL         |
| 23] | pos= 644 | score=0.026472 | unnormalised=5.4642000000   | VPQLSAIAL         |
| 24] | pos= -1  | score=0.507912 | unnormalised=104.8410000000 | non-binding event |

DoPeptideList\_II:

Given the antigen injected creates the list of peptides for all the NumAgProts proteins and for all i.e., 2 MHCII molecules

Read class II peptide list from file? NO

Allele: DRB1\_0101  
Pseudo sequence: KFAHVEQRKAQTRV  
Threshold: 2.392440  
Max score: 26.461000

Antigen sequence file: /opt/lampp/htdocs/C-IMMSIM/Jobs/input/50712\_20260523-104210\_5\_km00QLjwdbkx.FSA\_1\_001

MARGKKIGYSGLSRQTKDKAAEAAAPAPAPAEVTPAAAPVVAPAPAPAEAKKSEESDDMGFGLFDVAKNVAESAAE  
AAAPAEAAAAPAPAPVVKAEAKDLHSLLELGTKPTAPHVRNKKVILFDTNHQVSIQNQI IDAINSGIDLGLLEGLLT  
LCVEHYNSDKDSIISNSVQTRFSGLLIVKTVLEFLLQKTDGVTLHPLVVRTSKVKNEVASFKQALSNLARHGEYAPFA  
NLSGINNLEHGLYPQLSAIALGVATAHGSTLAGVNVGEQYQLREAAHDAEVKLRQRRHEHQEIQAIATVQARPMNRPTAL  
PPPVDKIEHSTEDSSSSSFVDLNDPFFALLNEDEDTLDDSVMIPTTSREFQGPQRVVTKGRTFLYPNDLLQTNPPE  
SLITALVEEYQNPVSAKELQADWPDMSFDERRHVAMCPGPGGLYPQLSAILHQGVNLVLTLCVEHYQLSAIALGVQTL  
AVLSQKRPMNRPTALTEITHSQTLLTVQARPMNRYPQLSAIALAAYVIFGILRSSFILKFPVPLILALKTLESTESQKILEQ  
FHLQKTEITHVLEFLLQKTDGVTGRIGLFLSFCSLFLIALGVATAHGSTLAGATRFLDVIPNEPHYSEHGLYPQLSA  
IALGVPQLSAIALGVATAHGSTLAVLSQKRELAHHHHHHH

Epitopes of protein 0 -----

|     |          |                |                            |           |
|-----|----------|----------------|----------------------------|-----------|
| 0]  | pos= 8   | score=0.043680 | unnormalised=11.8545600000 | YSGLSRQT  |
| 1]  | pos= 35  | score=0.011841 | unnormalised=3.2135600000  | VTPAAAPVV |
| 2]  | pos= 42  | score=0.015382 | unnormalised=4.1745600000  | VVAPAPAPA |
| 3]  | pos= 66  | score=0.011262 | unnormalised=3.0565600000  | FDVAKNVAA |
| 4]  | pos= 72  | score=0.006122 | unnormalised=1.6615600000  | VAAESAAEA |
| 5]  | pos= 104 | score=0.002419 | unnormalised=0.6565600000  | LHSLLELGT |
| 6]  | pos= 183 | score=0.014317 | unnormalised=3.8855600000  | FSGLLIVKT |
| 7]  | pos= 222 | score=0.055058 | unnormalised=14.9425600000 | FKQALSNLA |
| 8]  | pos= 235 | score=0.009011 | unnormalised=2.4455600000  | YAPFANLSG |
| 9]  | pos= 238 | score=0.021222 | unnormalised=5.7595600000  | FANLSGINN |
| 10] | pos= 251 | score=0.017714 | unnormalised=4.8075600000  | LYPQLSAIA |
| 11] | pos= 252 | score=0.033882 | unnormalised=9.1955600000  | YPQLSAIAL |
| 12] | pos= 262 | score=0.005308 | unnormalised=1.4405600000  | VATAHGSTL |
| 13] | pos= 279 | score=0.012423 | unnormalised=3.3715600000  | YQQLREAAH |
| 14] | pos= 302 | score=0.025153 | unnormalised=6.8265600000  | IQAIATVQA |
| 15] | pos= 305 | score=0.020227 | unnormalised=5.4895600000  | IATVQARPM |
| 16] | pos= 392 | score=0.008609 | unnormalised=2.3365600000  | LLQTNPPES |
| 17] | pos= 393 | score=0.032243 | unnormalised=8.7505600000  | LQTNPPESL |

|     |          |                |                            |                   |
|-----|----------|----------------|----------------------------|-------------------|
| 18] | pos= 442 | score=0.020172 | unnormalised=5.4745600000  | LYPQLSAIL         |
| 19] | pos= 443 | score=0.033355 | unnormalised=9.0525600000  | YPQLSAILI         |
| 20] | pos= 450 | score=0.003753 | unnormalised=1.0185600000  | LIHQGVNLV         |
| 21] | pos= 451 | score=0.001472 | unnormalised=0.3995600000  | IHQGVNLVL         |
| 22] | pos= 455 | score=0.000945 | unnormalised=0.2565600000  | VNLVLTLCV         |
| 23] | pos= 466 | score=0.059752 | unnormalised=16.2165600000 | YYQLSAIAL         |
| 24] | pos= 467 | score=0.010621 | unnormalised=2.8825600000  | YQLSAIALG         |
| 25] | pos= 497 | score=0.005835 | unnormalised=1.5835600000  | ITHSQTLTV         |
| 26] | pos= 513 | score=0.033882 | unnormalised=9.1955600000  | YPQLSAIAL         |
| 27] | pos= 527 | score=0.037290 | unnormalised=10.1205600000 | FGILRSSFI         |
| 28] | pos= 542 | score=0.010894 | unnormalised=2.9565600000  | ILALKTLES         |
| 29] | pos= 545 | score=0.020573 | unnormalised=5.5835600000  | LKTLESTES         |
| 30] | pos= 548 | score=0.007427 | unnormalised=2.0155600000  | LESTESQKI         |
| 31] | pos= 560 | score=0.021413 | unnormalised=5.8115600000  | FHLQKTEIT         |
| 32] | pos= 591 | score=0.015673 | unnormalised=4.2535600000  | FLSFCSLFL         |
| 33] | pos= 594 | score=0.012261 | unnormalised=3.3275600000  | FCSLFLIAL         |
| 34] | pos= 598 | score=0.034534 | unnormalised=9.3725600000  | FLIALGVAT         |
| 35] | pos= 604 | score=0.005308 | unnormalised=1.4405600000  | VATAHGSTL         |
| 36] | pos= 633 | score=0.017714 | unnormalised=4.8075600000  | LYPQLSAIA         |
| 37] | pos= 634 | score=0.033882 | unnormalised=9.1955600000  | YPQLSAIAL         |
| 38] | pos= 640 | score=0.005544 | unnormalised=1.5045600000  | IALGVPQLS         |
| 39] | pos= 644 | score=0.012268 | unnormalised=3.3295600000  | VPQLSAIAL         |
| 40] | pos= 654 | score=0.005754 | unnormalised=1.5615600000  | VATAHGSQT         |
| 41] | pos= -1  | score=0.243804 | unnormalised=66.1680000000 | non-binding event |

=====

Allele: DRB1\_0101  
Pseudo sequence: KAFAHVEQRKAQTRV  
Threshold: 2.392440  
Max score: 26.461000

-----  
Antigen sequence file: /opt/lampp/htdocs/C-IMMSIM/Jobs/input/50712\_20260523-104210\_5\_km00QLjwdbkx.FSA\_1\_001  
-----

MARGKKIGYSGLKSRQTKDKAAEAAAPAPAPAEVTPAAAPVVPAPAPAEAKKSEESDDMGFLFDVAKNVAESA  
AAAPAEAAAAAPAPAPVVKAEAKDLHSLLELGTKPTAPHVRNKKVILFDTNHQVSIICNQIIDAINGIDLGLLEGLLT  
LCVEHYNSDKDSIISNSVQTRFSGLLIWKTVLEFLLQKTDSGVTLHPLVRTSKVKNEVASFKQALSNLARHGEPFPA  
NLSGINLEHGLYPQLSAIALGVATAHGSTLAGVNVGEYQQLREAHADEVKLQRRHEHQEIQAIAITVQARPMNRPTAL  
PPPVDKIEHESTEDSSSSSFDLNDPFDLNEDEDLDDSVMPGTTSTREFQGPQRVVTKKGRFTLYPNDLLQTNPPE  
SLITALVEEYQNPVSAKELQADWPDMFERRRHVAMCPGPGGLYPQLSAILIHQGVNLVLTLCVEHYQLSAIALGVQTL  
AVLSQKRPMNRPTALTEITHSQTLTVQARPMNRYPLSAIALAAYVIFGILRSSFILKFVPLILALKTLESTESQKILEQ  
FHLQKTEITHTVLEFLLQKTDSGVTRGRIGLFLSFCSLFLIALGVATAHGSTLAGATRFDVIPNEPHYSEHGLYPQLSA  
IALGVPQLSAIALGVATAHGSTLAVLSQKRELAHHHHHH

Epitopes of protein 0 -----  
0] pos= 8 score=0.043680 unnormalised=11.8545600000 YSGLKSRQT  
1] pos= 35 score=0.011841 unnormalised=3.2135600000 VTPAAAPVV  
2] pos= 42 score=0.015382 unnormalised=4.1745600000 VVAPAPAPA  
3] pos= 66 score=0.011262 unnormalised=3.0565600000 FDVAKNVAA  
4] pos= 72 score=0.006122 unnormalised=1.6615600000 VAAESAEEA  
5] pos= 104 score=0.002419 unnormalised=0.6565600000 LHSLELGT  
6] pos= 183 score=0.014317 unnormalised=3.8855600000 FSGLLIVKT  
7] pos= 222 score=0.055058 unnormalised=14.9425600000 FKQALSNLA  
8] pos= 235 score=0.009011 unnormalised=2.4455600000 YAPFANLSG  
9] pos= 238 score=0.021222 unnormalised=5.7595600000 FANLSGINN  
10] pos= 251 score=0.017714 unnormalised=4.8075600000 LYPQLSAIA  
11] pos= 252 score=0.033882 unnormalised=9.1955600000 YPQLSAIAL  
12] pos= 262 score=0.005308 unnormalised=1.4405600000 VATAHGSTL  
13] pos= 279 score=0.012423 unnormalised=3.3715600000 YQLREAAH  
14] pos= 302 score=0.025153 unnormalised=6.8265600000 IQAIATVQA  
15] pos= 305 score=0.020227 unnormalised=5.4895600000 IATVQARPM  
16] pos= 392 score=0.008609 unnormalised=2.3365600000 LLQTNPPES

|     |          |                |                            |                   |
|-----|----------|----------------|----------------------------|-------------------|
| 17] | pos= 393 | score=0.032243 | unnormalised=8.7505600000  | LQTNPPESL         |
| 18] | pos= 442 | score=0.020172 | unnormalised=5.4745600000  | LYPQLSAIL         |
| 19] | pos= 443 | score=0.033355 | unnormalised=9.0525600000  | YPQLSAILI         |
| 20] | pos= 450 | score=0.003753 | unnormalised=1.0185600000  | LIHQGVNLV         |
| 21] | pos= 451 | score=0.001472 | unnormalised=0.3995600000  | IHQGVNLVL         |
| 22] | pos= 455 | score=0.000945 | unnormalised=0.2565600000  | VNLVLTLCV         |
| 23] | pos= 466 | score=0.059752 | unnormalised=16.2165600000 | YYQLSAIAL         |
| 24] | pos= 467 | score=0.010621 | unnormalised=2.8825600000  | YQLSAIALG         |
| 25] | pos= 497 | score=0.005835 | unnormalised=1.5835600000  | ITHSQTITV         |
| 26] | pos= 513 | score=0.033882 | unnormalised=9.1955600000  | YPQLSAIAL         |
| 27] | pos= 527 | score=0.037290 | unnormalised=10.1205600000 | FGILRSSFI         |
| 28] | pos= 542 | score=0.010894 | unnormalised=2.9565600000  | ILALKTLES         |
| 29] | pos= 545 | score=0.020573 | unnormalised=5.5835600000  | LKTLESTES         |
| 30] | pos= 548 | score=0.007427 | unnormalised=2.0155600000  | LESTESQKI         |
| 31] | pos= 560 | score=0.021413 | unnormalised=5.8115600000  | FHLQKTEIT         |
| 32] | pos= 591 | score=0.015673 | unnormalised=4.2535600000  | FLSFCSLFL         |
| 33] | pos= 594 | score=0.012261 | unnormalised=3.3275600000  | FCSLFLIAL         |
| 34] | pos= 598 | score=0.034534 | unnormalised=9.3725600000  | FLIALGVAT         |
| 35] | pos= 604 | score=0.005308 | unnormalised=1.4405600000  | VATAHGSTL         |
| 36] | pos= 633 | score=0.017714 | unnormalised=4.8075600000  | LYPQLSAIA         |
| 37] | pos= 634 | score=0.033882 | unnormalised=9.1955600000  | YPQLSAIAL         |
| 38] | pos= 640 | score=0.005544 | unnormalised=1.5045600000  | IALGVPQLS         |
| 39] | pos= 644 | score=0.012268 | unnormalised=3.3295600000  | VPQLSAIAL         |
| 40] | pos= 654 | score=0.005754 | unnormalised=1.5615600000  | VATAHGSQT         |
| 41] | pos= -1  | score=0.243804 | unnormalised=66.1680000000 | non-binding event |

---
