# Supplementary material
Source: Research Square preprint supplement (doi:10.21203/rs.3.rs-9870714/v1)
Supplement: Supplementary file 4 [file 2068314261dbe98531cb6be8.docx]

**Allergenic Result of Vaccine Marburg**

**Results for your protein:**
MARGKKIGYSGLKSRQTKDKAAEAAAPAAPAPAPEVTPAAAPVVAPAPAPAEAKKSEESDDMGFGLFDVAKNVAAESAAEAAAPAEEAAAAPAPAPVVKEAKKDLHSLLELGTKPTAPHVRNKKVILFDTNHQVSICNQIIDAINSGIDLGDLLEGGLLTLCVEHYYNSDKDSIISNSVGQTRFSGLLIVKTVLEFILQKTDSGVTLHPLVRTSKVKNEVASFKQALSNLARHGEYAPFANLSGINNLEHGLYPQLSAIALGVATAHGSTLAGVNVGEQYQQLREAAHDAEVKLQRRHEHQEIQAIATVQARPMNRPTALPPPVDDKIEHESTEDSSSSSSFVDLNDPFALLNEDEDTLDDSVMIPGTTSREFQGPQRVVTKKGRTFLYPNDLLQTNPPESLITALVEEYQNPVSAKELQADWPDMSFDERRHVAMCPGPGGLYPQLSAILIHQGVNLVLTLCVEHYYQLSAIALGVQTLAVLSQKRPMNRPTALTEITHSQTLTVQARPMNRYPQLSAIALAAYVIFGILRSSFILKFVPLILALKTLESTESQKILEQFHLQKTEITHTVLEFILQKTDSGVTRGRIGLFLSFCSLFLIALGVATAHGSTLAGATRFLDVIPNEPHYSEHGLYPQLSAIALGVPQLSAIALGVATAHGSQTLAVLSQKREKLAHHHHHH

- Most similar protein: sp|Q7Y1V5|C78AB_ORYSJ Cytochrome P450 78A11 OS=Oryza sativa subsp. japonica GN=CYP78A11 PE=1 SV=2
- Classification based on the most similar protein: Probable NON-ALLERGEN
