# Supplementary material
Source: Research Square preprint supplement (doi:10.21203/rs.3.rs-9870714/v1)
Supplement: Supplementary file 5 [file 25406135a790c1a43030a27c.docx]

**Optimized Vaccine Gene Sequence**

ATGGCGCGCGGCAAAAAAATTGGCTATAGCGGCCTGAAAAGCCGCCAGAC     50
CAAAGATAAAGCGGCGGAAGCGGCGGCGCCGGCGGCGCCGGCGCCGGCGC     100
CGGAAGTGACCCCGGCGGCGGCGCCGGTGGTGGCGCCGGCGCCGGCGCCG     150
GCGGAAGCGAAAAAAAGCGAAGAAAGCGATGATATG**GGG**TTTGGCCTG**TT**     200
**CGAC**GTGGCGAAAAACGTGGCGGCGGAAAGCGCGGCGGAAGCGGCGGCGC     250
CGGCGGAAGAAGCGGCGGCGGCGCCGGCGCCGGCGCCGGTGGTGAAAGAA     300
GCGAAAAAAGATCTGCATAGCCTGCTGGAACTGGGCACCAAACCGACCGC     350
GCCGCATGTGCGCAACAAAAAAGTGATTCTGTTTGATACCAACCATCAGG     400
TGAGCATTTGCAACCAGATTATTGATGCGATTAACAGCGGCATTGATCTG     450
GGCGATCTGCTGGAAGGCGGCCTGCTGACCCTGTGCGTGGAACATTATTA     500
TAACAGCGATAAAGATAGCATTATTAGCAACAGC**GTT**GGCCAGACCCGC**T**     550
**TC**AGCGGCCTG**CTA**ATTGTGAAAACCGTGCTGGAATTTATTCTGCAGAAA     600
ACCGATAGCGGCGTGACCCTGCATCCGCTGGTGCGCACCAGCAAAGTGAA     650
AAACGAAGTGGCGAGCTTTAAACAGGCGCTGAGCAACCTGGCGCGCCATG     700
GCGAA**TACGCT**CCG**TTC**GCGAACCTGAGCGGCATTAACAACCTGGAACAT     750
GGCCTGTATCCGCAGCTGAGCGCGATTGCGCTGGGCGTGGCGACCGCGCA     800
TGGCAGCACCCTGGCGGGCGTGAACGTGGGCGAACAGTATCAGCAGCTGC     850
GCGAAGCGGCGCATGATGCGGAAGTGAAACTGCAGCGCCGCCATGAACAT     900
CAGGAAATTCAGGCGATTGCGACCGTGCAGGCGCGCCCGATGAACCGCCC     950
GACCGCGCTGCCGCCGCCGGTGGATGATAAAATTGAACATGAAAGCACCG     1000
AAGATAGCAGC**TCGTCG**AGCAGC**TTC**GTG**GAC**CTG**AATGAC**CCG**TTC**GCG     1050
**CTA**CTGAACGAAGATGAAGATACCCTGGATGATAGCGTGATGATTCCGGG     1100
CACCACCAGCCGCGAATTTCAGGGCCCGCAGCGCGTGGTGACCAAAAAAG     1150
GCCGCACCTTTCTGTATCCGAACGATCTGCTGCAGACCAACCCGCCGGAA     1200
AGCCTGATTACCGCGCTGGTGGAAGAATATCAGAACCCGGTGAGCGCGAA     1250
AGAACTGCAGGCGGATTGGCCGGATATGAGCTTTGATGAACGCCGCCATG     1300
TGGCGATGTGCCCGGGCCCGGGCGGCCTGTATCCGCAGCTGAGCGCGATT     1350
CTGATTCATCAGGGCGTGAACCTGGTGCTGACCCTGTGCGTGGAACATTA     1400
TTATCAGCTGAGCGCGATTGCGCTGGGCGTGCAGACCCTGGCGGTGCTGA     1450
GCCAGAAACGCCCGATGAACCGCCCGACCGCGCTGACCGAAATTACCCAT     1500
AGCCAGACCCTGACCGTGCAGGCGCGCCCGATGAACCGCTATCCGCAGCT     1550
GAGCGCGATTGCGCTGGCGGCGTATGTGATTTTTGGCATTCTG**CGTTCG**A     1600
GC**TTCATA**CTGAAATTTGTGCCGCTGATTCTGGCGCTGAAAACCCTGGAA     1650
AGCACCGAAAGCCAGAAAATTCTGGAACAGTTTCATCTGCAGAAAACCGA     1700
AATTACCCATACCGTGCTGGAATTTATTCTGCAGAAAACCGATAGCGGCG     1750
TGACCCGCGGC**AGGATA**GGCCTG**TTC**CTGAGC**TTC**TGCAGCCTGTTTCTG     1800
ATTGCGCTGGGCGTGGCGACCGCGCATGGCAGCACCCTG**GCAGGG**GCGAC     1850
CCGC**TTC**CTG**GAC**GTGATTCCGAACGAACCGCATTATAGCGAACATGGCC     1900
TGTATCCGCAGCTGAGCGCGATTGCGCTGGGCGTGCCGCAGCTGAGCGCG     1950
ATTGCGCTGGGCGTGGCGACCGCGCATGGCAGCCAGACCCTGGCGGTGCT     2000
GAGCCAGAAACGCGAAAAACTGGCGCATCATCATCATCATCAT
