# Supplementary material
Source: Research Square preprint supplement (doi:10.21203/rs.3.rs-9870714/v1)
Supplement: Supplementary file 6 [file 29c54aad04494d18e1c24426.docx]

**Population Coverage Calculation Result MHC-II Marburg**

Note: Following allele(s) are not available and therefore not included in the calculation, please note that allele names are case sensitive:
HLA-DPA1*02:01/DPB1*05:01, HLA-DPA1*01:03/DPB1*04:01, HLA-DPA1*03:01/DPB1*04:02, HLA-DPA1*01:03/DPB1*02:01, HLA-DRB5*01:01, HLA-DQA1*05:01/DQB1*03:01, HLA-DPA1*02:01/DPB1*01:01, HLA-DRB4*01:01,

| **population/area** | **Class II** | | |
| --- | --- | --- | --- |
| **coveragea** | **average_hitb** | **pc90c** |
| [World](https://tools.iedb.org/population/result/#World) | 71.72% | 2.44 | 0.35 |
|  |  |  |  |
| **Average** | **71.72** | **2.44** | **0.35** |
| **Standard deviation** | **0.0** | **0.0** | **0.0** |

a projected population coverage
b average number of epitope hits / HLA combinations recognized by the population
c minimum number of epitope hits / HLA combinations recognized by 90% of the population

***Population: World***

| **MHC class** | **Coverage** | **Average hit** | **PC90** |
| --- | --- | --- | --- |
| II | 71.72% | 2.44 | 0.35 |
| 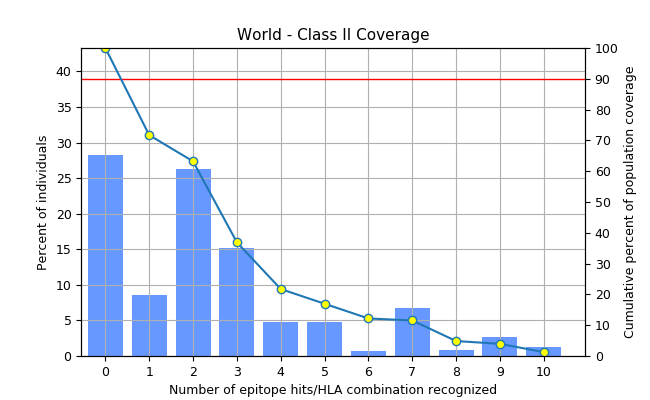 | | | |
| Top of Form  Bottom of Form | | | |
