# Supplementary material
Source: Research Square preprint supplement (doi:10.21203/rs.3.rs-9870714/v1)
Supplement: Supplementary file 6 [file 34a978dbd87127e4c790caee.xlsx]

## Sheet: Sheet1
Peptide	Allele	Antigenecity	Allergenecity
VIFGILRSSFILKFV	HLA-DPA1*01:03/DPB1*02:01 , HLA-DPA1*01:03/DPB1*04:01 , HLA-DPA1*02:01/DPB1*01:01 , HLA-DPA1*02:01/DPB1*05:01 , HLA-DPA1*03:01/DPB1*04:02 , HLA-DRB1*01:01 , HLA-DRB1*07:01 , HLA-DRB1*09:01 , HLA-DRB1*12:01 , HLA-DRB1*13:02 , HLA-DRB1*15:01 , HLA-DRB5*01:01	Antigen	Non-allergen
PLILALKTLESTESQ	HLA-DRB1*01:01 , HLA-DRB1*04:01 , HLA-DRB1*04:05 , HLA-DRB4*01:01	Antigen	Non-allergen
KILEQFHLQKTEITH	HLA-DRB1*01:01 , HLA-DRB1*04:05 , HLA-DRB4*01:01	Antigen	Non-allergen
TVLEFILQKTDSGVT	HLA-DRB1*01:01 , HLA-DRB1*04:01 , HLA-DRB4*01:01	Antigen	Non-allergen
RGRIGLFLSFCSLFL	HLA-DPA1*01:03/DPB1*02:01 , HLA-DRB1*07:01 , HLA-DRB1*15:01	Antigen	Non-allergen
IALGVATAHGSTLAG	HLA-DQA1*05:01/DQB1*03:01 , HLA-DRB1*01:01 , HLA-DRB1*09:01	Antigen	Non-allergen
ATRFLDVIPNEPHYS	HLA-DRB1*04:01 , HLA-DRB1*04:05 , HLA-DRB1*13:02	Antigen	Non-allergen
EHGLYPQLSAIALGV	HLA-DRB1*01:01 , HLA-DRB1*09:01	Antigen	Non-allergen
PQLSAIALGVATAHG	HLA-DQA1*05:01/DQB1*03:01 , HLA-DRB1*01:01	Antigen	Non-allergen
SQTLAVLSQKREKLA	HLA-DRB1*11:01 , HLA-DRB5*01:01	Antigen	Non-allergen
		Antigen	Non-allergen
