# Supplementary material
Source: Research Square preprint supplement (doi:10.21203/rs.3.rs-9870714/v1)
Supplement: Supplementary file 7 [file 366860702376ae97ba63a08f.docx]

**nucleoprotein [Marburg virus - Musoke, Kenya, 1980]**

NCBI Reference Sequence: YP_001531153.1

[GenPept](https://www.ncbi.nlm.nih.gov/protein/YP_001531153.1?report=genpept)[Identical Proteins](https://www.ncbi.nlm.nih.gov/ipg/YP_001531153.1)[Graphics](https://www.ncbi.nlm.nih.gov/protein/YP_001531153.1?report=graph)

>YP_001531153.1 nucleoprotein [Marburg virus - Musoke, Kenya, 1980]

MDLHSLLELGTKPTAPHVRNKKVILFDTNHQVSICNQIIDAINSGIDLGDLLEGGLLTLCVEHYYNSDKD

KFNTSPIAKYLRDAGYEFDVIKNADATRFLDVIPNEPHYSPLILALKTLESTESQRGRIGLFLSFCSLFL

PKLVVGDRASIEKALRQVTVHQEQGIVTYPNHWLTTGHMKVIFGILRSSFILKFVLIHQGVNLVTGHDAY

DSIISNSVGQTRFSGLLIVKTVLEFILQKTDSGVTLHPLVRTSKVKNEVASFKQALSNLARHGEYAPFAR

VLNLSGINNLEHGLYPQLSAIALGVATAHGSTLAGVNVGEQYQQLREAAHDAEVKLQRRHEHQEIQAIAE

DDEERKILEQFHLQKTEITHSQTLAVLSQKREKLARLAAEIENNIVEDQGFKQSQNRVSQSFLNDPTPVE

VTVQARPMNRPTALPPPVDDKIEHESTEDSSSSSSFVDLNDPFALLNEDEDTLDDSVMIPGTTSREFQGI

PEPPRQSQDLNNSQGKQEDESTNPIKKQFLRYQELPPVQEDDESEYTTDSQESIDQPGSDNEQGVDLPPP

PLYAQEKRQDPIQHPAANPQDPFGSIGDVNGDILEPIRSPSSPSAPQEDTRMREAYELSPDFTNDEDNQQ

NWPQRVVTKKGRTFLYPNDLLQTNPPESLITALVEEYQNPVSAKELQADWPDMSFDERRHVAMNL
