# Supplementary material
Source: Research Square preprint supplement (doi:10.21203/rs.3.rs-9870714/v1)
Supplement: Supplementary file 8 [file 46047e01380cb790f61a5362.docx]

**Physio-Chemical Property of Vaccine Marburg**

**Number of amino acids:** 681

**Theoretical pI:** 6.11

**Molecular weight:** 73455.70

**Total number of negatively charged residues (Asp + Glu):** 71

**Total number of positively charged residues (Arg + Lys):** 58

**Formula:** C3271H5224N904O989S13

**Total number of atoms:** 10401

**Extinction coefficients:**

Extinction coefficients are in units of M-1 cm-1, at 280 nm measured in water.

Ext. coefficient 28100

Abs 0.1% (=1 g/l) 0.383, assuming all pairs of Cys residues form cystines

Ext. coefficient 27850

Abs 0.1% (=1 g/l) 0.379, assuming all Cys residues are reduced

**Estimated half-life:**

The N-terminal of the sequence considered is M (Met).

The estimated half-life is: 30 hours (mammalian reticulocytes, in vitro).

>20 hours (yeast, in vivo).

>10 hours (Escherichia coli, in vivo).

**Instability index:**

The instability index (II) is computed to be 44.61

This classifies the protein as unstable.

**Aliphatic index:** 96.92

**Grand average of hydropathicity (GRAVY):**-0.105
