# Supplementary material
Source: Research Square preprint supplement (doi:10.21203/rs.3.rs-9870714/v1)
Supplement: Supplementary file 9 [file 51f6cdb1b4026a9234a97162.docx]

**Physio-Chemical Properties of Protein Marburg**

**Number of amino acids:** 695

**Theoretical pI:** 4.91

**Molecular weight:** 77842.90

**Total number of negatively charged residues (Asp + Glu):** 103

**Total number of positively charged residues (Arg + Lys):** 63

**Formula:** C3429H5396N954O1096S10

**Total number of atoms:** 10885

**Extinction coefficients:**

Extinction coefficients are in units of M-1 cm-1, at 280 nm measured in water.

Ext. coefficient 40465

Abs 0.1% (=1 g/l) 0.520, assuming all pairs of Cys residues form cystines

Ext. coefficient 40340

Abs 0.1% (=1 g/l) 0.518, assuming all Cys residues are reduced

**Estimated half-life:**

The N-terminal of the sequence considered is M (Met).

The estimated half-life is: 30 hours (mammalian reticulocytes, in vitro).

>20 hours (yeast, in vivo).

>10 hours (Escherichia coli, in vivo).

**Instability index:**

The instability index (II) is computed to be 51.27

This classifies the protein as unstable.

**Aliphatic index:** 85.99

**Grand average of hydropathicity (GRAVY):**-0.546
