# Supplementary material
Source: Research Square preprint supplement (doi:10.21203/rs.3.rs-9870714/v1)
Supplement: Supplementary file 10 [file 581d13610180aae412e9f408.xlsx]

## Sheet: Sheet1
Peptide	Allele	Antigenecity	Allergenecity
GLYPQLSAI	HLA-A*02:01 , HLA-A*02:03 , HLA-A*02:06	Antigen	Non-allergen
LIHQGVNLV	HLA-A*02:03	Antigen	Non-allergen
LTLCVEHYY	HLA-A*30:02 , HLA-B*57:01 , HLA-B*58:01	Antigen	Non-allergen
QLSAIALGV	HLA-A*02:01 , HLA-A*02:03 , HLA-A*02:06 , HLA-A*68:02	Antigen	Non-allergen
QTLAVLSQK	HLA-A*03:01 , HLA-A*11:01 , HLA-A*68:01	Antigen	Non-allergen
RPMNRPTAL	HLA-B*07:02 , HLA-B*08:01	Antigen	Non-allergen
TEITHSQTL	HLA-B*40:01	Antigen	Non-allergen
TVQARPMNR	HLA-A*11:01 , HLA-A*31:01 , HLA-A*33:01 , HLA-A*68:01	Antigen	Non-allergen
YPQLSAIAL	HLA-B*07:02 , HLA-B*35:01	Antigen	Non-allergen
