# Supplementary material
Source: Research Square preprint supplement (doi:10.21203/rs.3.rs-9870714/v1)
Supplement: Supplementary file 10 [file 70080e189a9ec4e4f892f007.docx]

ToxDL: protein toxicity predictor

| ------------ Prediction result of ToxDL------------ |
| --- |

| **ToxDL** | **score** |
| --- | --- |
| **Being toxic protein** | **0.0009817759** |

|  |
| --- |

|  |
| --- |

| **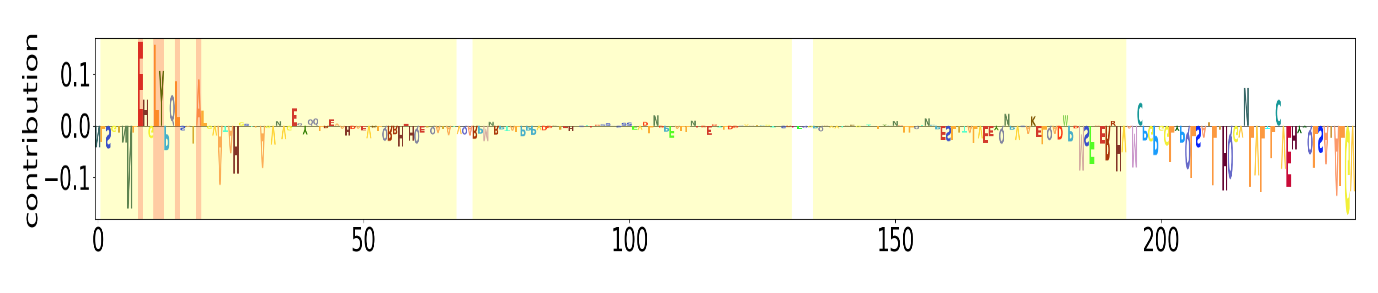** |
| --- |

|  |
| --- |

|  |
| --- |

| ------------ Any toxic domain detected by InterProScan in this protein------------ |
| --- |

| **No toxic domain is detected in this protein** |
| --- |
