# Supplementary material
Source: Research Square preprint supplement (doi:10.21203/rs.3.rs-9870714/v1)
Supplement: Supplementary file 13 [file c6be9b02fde909db68f7c507.docx]

**Antigenic Result of protein Marburg**

**Model selected: virus**

**Threshold for this model: 0.4**

**Your Sequence:**

MDLHSLLELGTKPTAPHVRNKKVILFDTNHQ
VSICNQIIDAINSGIDLGDLLEGGLLTLCVE
HYYNSDKDKFNTSPIAKYLRDAGYEFDVIKN
ADATRFLDVIPNEPHYSPLILALKTLESTES
QRGRIGLFLSFCSLFLPKLVVGDRASIEKAL
RQVTVHQEQGIVTYPNHWLTTGHMKVIFGIL
RSSFILKFVLIHQGVNLVTGHDAYDSIISNS
VGQTRFSGLLIVKTVLEFILQKTDSGVTLHP
LVRTSKVKNEVASFKQALSNLARHGEYAPFA
RVLNLSGINNLEHGLYPQLSAIALGVATAHG
STLAGVNVGEQYQQLREAAHDAEVKLQRRHE
HQEIQAIAEDDEERKILEQFHLQKTEITHSQ
TLAVLSQKREKLARLAAEIENNIVEDQGFKQ
SQNRVSQSFLNDPTPVEVTVQARPMNRPTAL
PPPVDDKIEHESTEDSSSSSSFVDLNDPFAL
LNEDEDTLDDSVMIPGTTSREFQGIPEPPRQ
SQDLNNSQGKQEDESTNPIKKQFLRYQELPP
VQEDDESEYTTDSQESIDQPGSDNEQGVDLP
PPPLYAQEKRQDPIQHPAANPQDPFGSIGDV
NGDILEPIRSPSSPSAPQEDTRMREAYELSP
DFTNDEDNQQNWPQRVVTKKGRTFLYPNDLL
QTNPPESLITALVEEYQNPVSAKELQADWPD
MSFDERRHVAMNL


Overall Prediction for the Protective Antigen =**0.4699**( Probable **ANTIGEN** ).
