# Supplementary material
Source: Research Square preprint supplement (doi:10.21203/rs.3.rs-9870714/v1)
Supplement: Supplementary file 14 [file db371a5dc7deb9052ad45c14.docx]

**Population Coverage Calculation Result MHC-I Marburg**

| **population/area** | **Class I** | | |
| --- | --- | --- | --- |
| **coveragea** | **average_hitb** | **pc90c** |
| [World](https://tools.iedb.org/population/result/#World) | 85.19% | 2.16 | 0.68 |
|  |  |  |  |
| **Average** | **85.19** | **2.16** | **0.68** |
| **Standard deviation** | **0.0** | **0.0** | **0.0** |

a projected population coverage
b average number of epitope hits / HLA combinations recognized by the population
c minimum number of epitope hits / HLA combinations recognized by 90% of the population

***Population: World***

| **MHC class** | **Coverage** | **Average hit** | **PC90** |
| --- | --- | --- | --- |
| I | 85.19% | 2.16 | 0.68 |
| 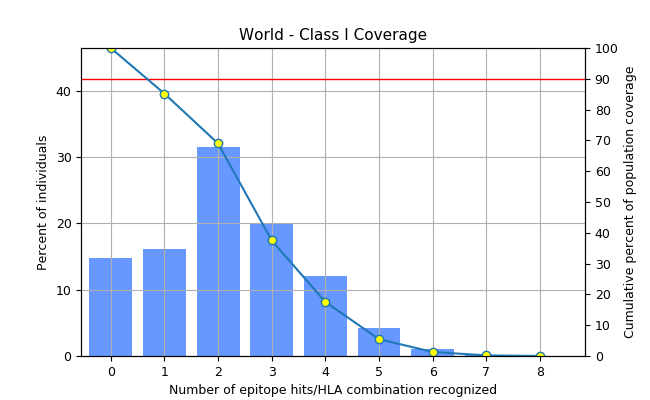 | | | |
