# Supplementary material
Source: Research Square preprint supplement (doi:10.21203/rs.3.rs-9870714/v1)
Supplement: Supplementary file 15 [file f1290743389a6577a668b602.docx]

**Solubility Result of Vaccine**

**Job results**

**Job ID:** 036f0da608

Sequences: [input.fasta](https://loschmidt.chemi.muni.cz/soluprot/jobs/03/036f0da608/input.fasta)

| **Protein** | **Solubility** |
| --- | --- |
|  | 0.811 |

Solubility score above 0.5 (towards green color) indicates soluble expression, score below 0.5 (towards red color) indicates insoluble expression in *Escherichia coli*.
