# Supplementary material
Source: Research Square preprint supplement (doi:10.21203/rs.3.rs-9870714/v1)
Supplement: Supplementary file 16 [file f5c0167b80a4c8a0cdd01314.docx]

| **Peptide** | **Allele** | **Antigenecity** | **Allergenecity** |
| --- | --- | --- | --- |
| GLYPQLSAI | HLA-A*02:01 , HLA-A*02:03 , HLA-A*02:06 | Antigen | Non-allergen |
| LIHQGVNLV | HLA-A*02:03 | Antigen | Non-allergen |
| LTLCVEHYY | HLA-A*30:02 , HLA-B*57:01 , HLA-B*58:01 | Antigen | Non-allergen |
| QLSAIALGV | HLA-A*02:01 , HLA-A*02:03 , HLA-A*02:06 , HLA-A*68:02 | Antigen | Non-allergen |
| QTLAVLSQK | HLA-A*03:01 , HLA-A*11:01 , HLA-A*68:01 | Antigen | Non-allergen |
| RPMNRPTAL | HLA-B*07:02 , HLA-B*08:01 | Antigen | Non-allergen |
| TEITHSQTL | HLA-B*40:01 | Antigen | Non-allergen |
| TVQARPMNR | HLA-A*11:01 , HLA-A*31:01 , HLA-A*33:01 , HLA-A*68:01 | Antigen | Non-allergen |
| YPQLSAIAL | HLA-B*07:02 , HLA-B*35:01 | Antigen | Non-allergen |
