# Supplementary material
Source: Research Square preprint supplement (doi:10.21203/rs.3.rs-9870714/v1)
Supplement: Supplementary file 17 [file f66fb907edef96ba28778fbb.docx]

**Antigenic Result of Vaccine Marburg**

**Model selected: virus**

**Threshold for this model: 0.4**

**Your Sequence:**

MARGKKIGYSGLKSRQTKDKAAEAAAPAAPA
PAPEVTPAAAPVVAPAPAPAEAKKSEESDDM
GFGLFDVAKNVAAESAAEAAAPAEEAAAAPA
PAPVVKEAKKDLHSLLELGTKPTAPHVRNKK
VILFDTNHQVSICNQIIDAINSGIDLGDLLE
GGLLTLCVEHYYNSDKDSIISNSVGQTRFSG
LLIVKTVLEFILQKTDSGVTLHPLVRTSKVK
NEVASFKQALSNLARHGEYAPFANLSGINNL
EHGLYPQLSAIALGVATAHGSTLAGVNVGEQ
YQQLREAAHDAEVKLQRRHEHQEIQAIATVQ
ARPMNRPTALPPPVDDKIEHESTEDSSSSSS
FVDLNDPFALLNEDEDTLDDSVMIPGTTSRE
FQGPQRVVTKKGRTFLYPNDLLQTNPPESLI
TALVEEYQNPVSAKELQADWPDMSFDERRHV
AMCPGPGGLYPQLSAILIHQGVNLVLTLCVE
HYYQLSAIALGVQTLAVLSQKRPMNRPTALT
EITHSQTLTVQARPMNRYPQLSAIALAAYVI
FGILRSSFILKFVPLILALKTLESTESQKIL
EQFHLQKTEITHTVLEFILQKTDSGVTRGRI
GLFLSFCSLFLIALGVATAHGSTLAGATRFL
DVIPNEPHYSEHGLYPQLSAIALGVPQLSAI
ALGVATAHGSQTLAVLSQKREKLAHHHHHH


Overall Prediction for the Protective Antigen =**0.6416**( Probable **ANTIGEN** ).
